# Supplementary material
Source: publisher site journal article supplement (https://www.dovepress.com/get_supplementary_file.php?f=282660.docx)
Supplement: Supplementary file 1 [file get_supplementary_file.php]

**
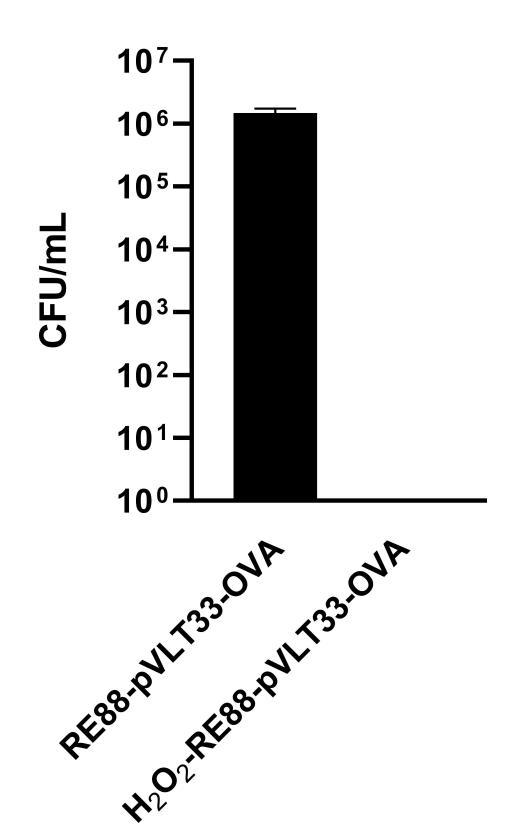
**

**Fig. S1. The effect of hydrogen peroxide (H2O2) in killing RE88-pVLT33-OVA**. RE88 were treated with 3% H2O2 at 37 °C after 1 h and then cultured on LB plates to allow bacterial growth was observed.

**
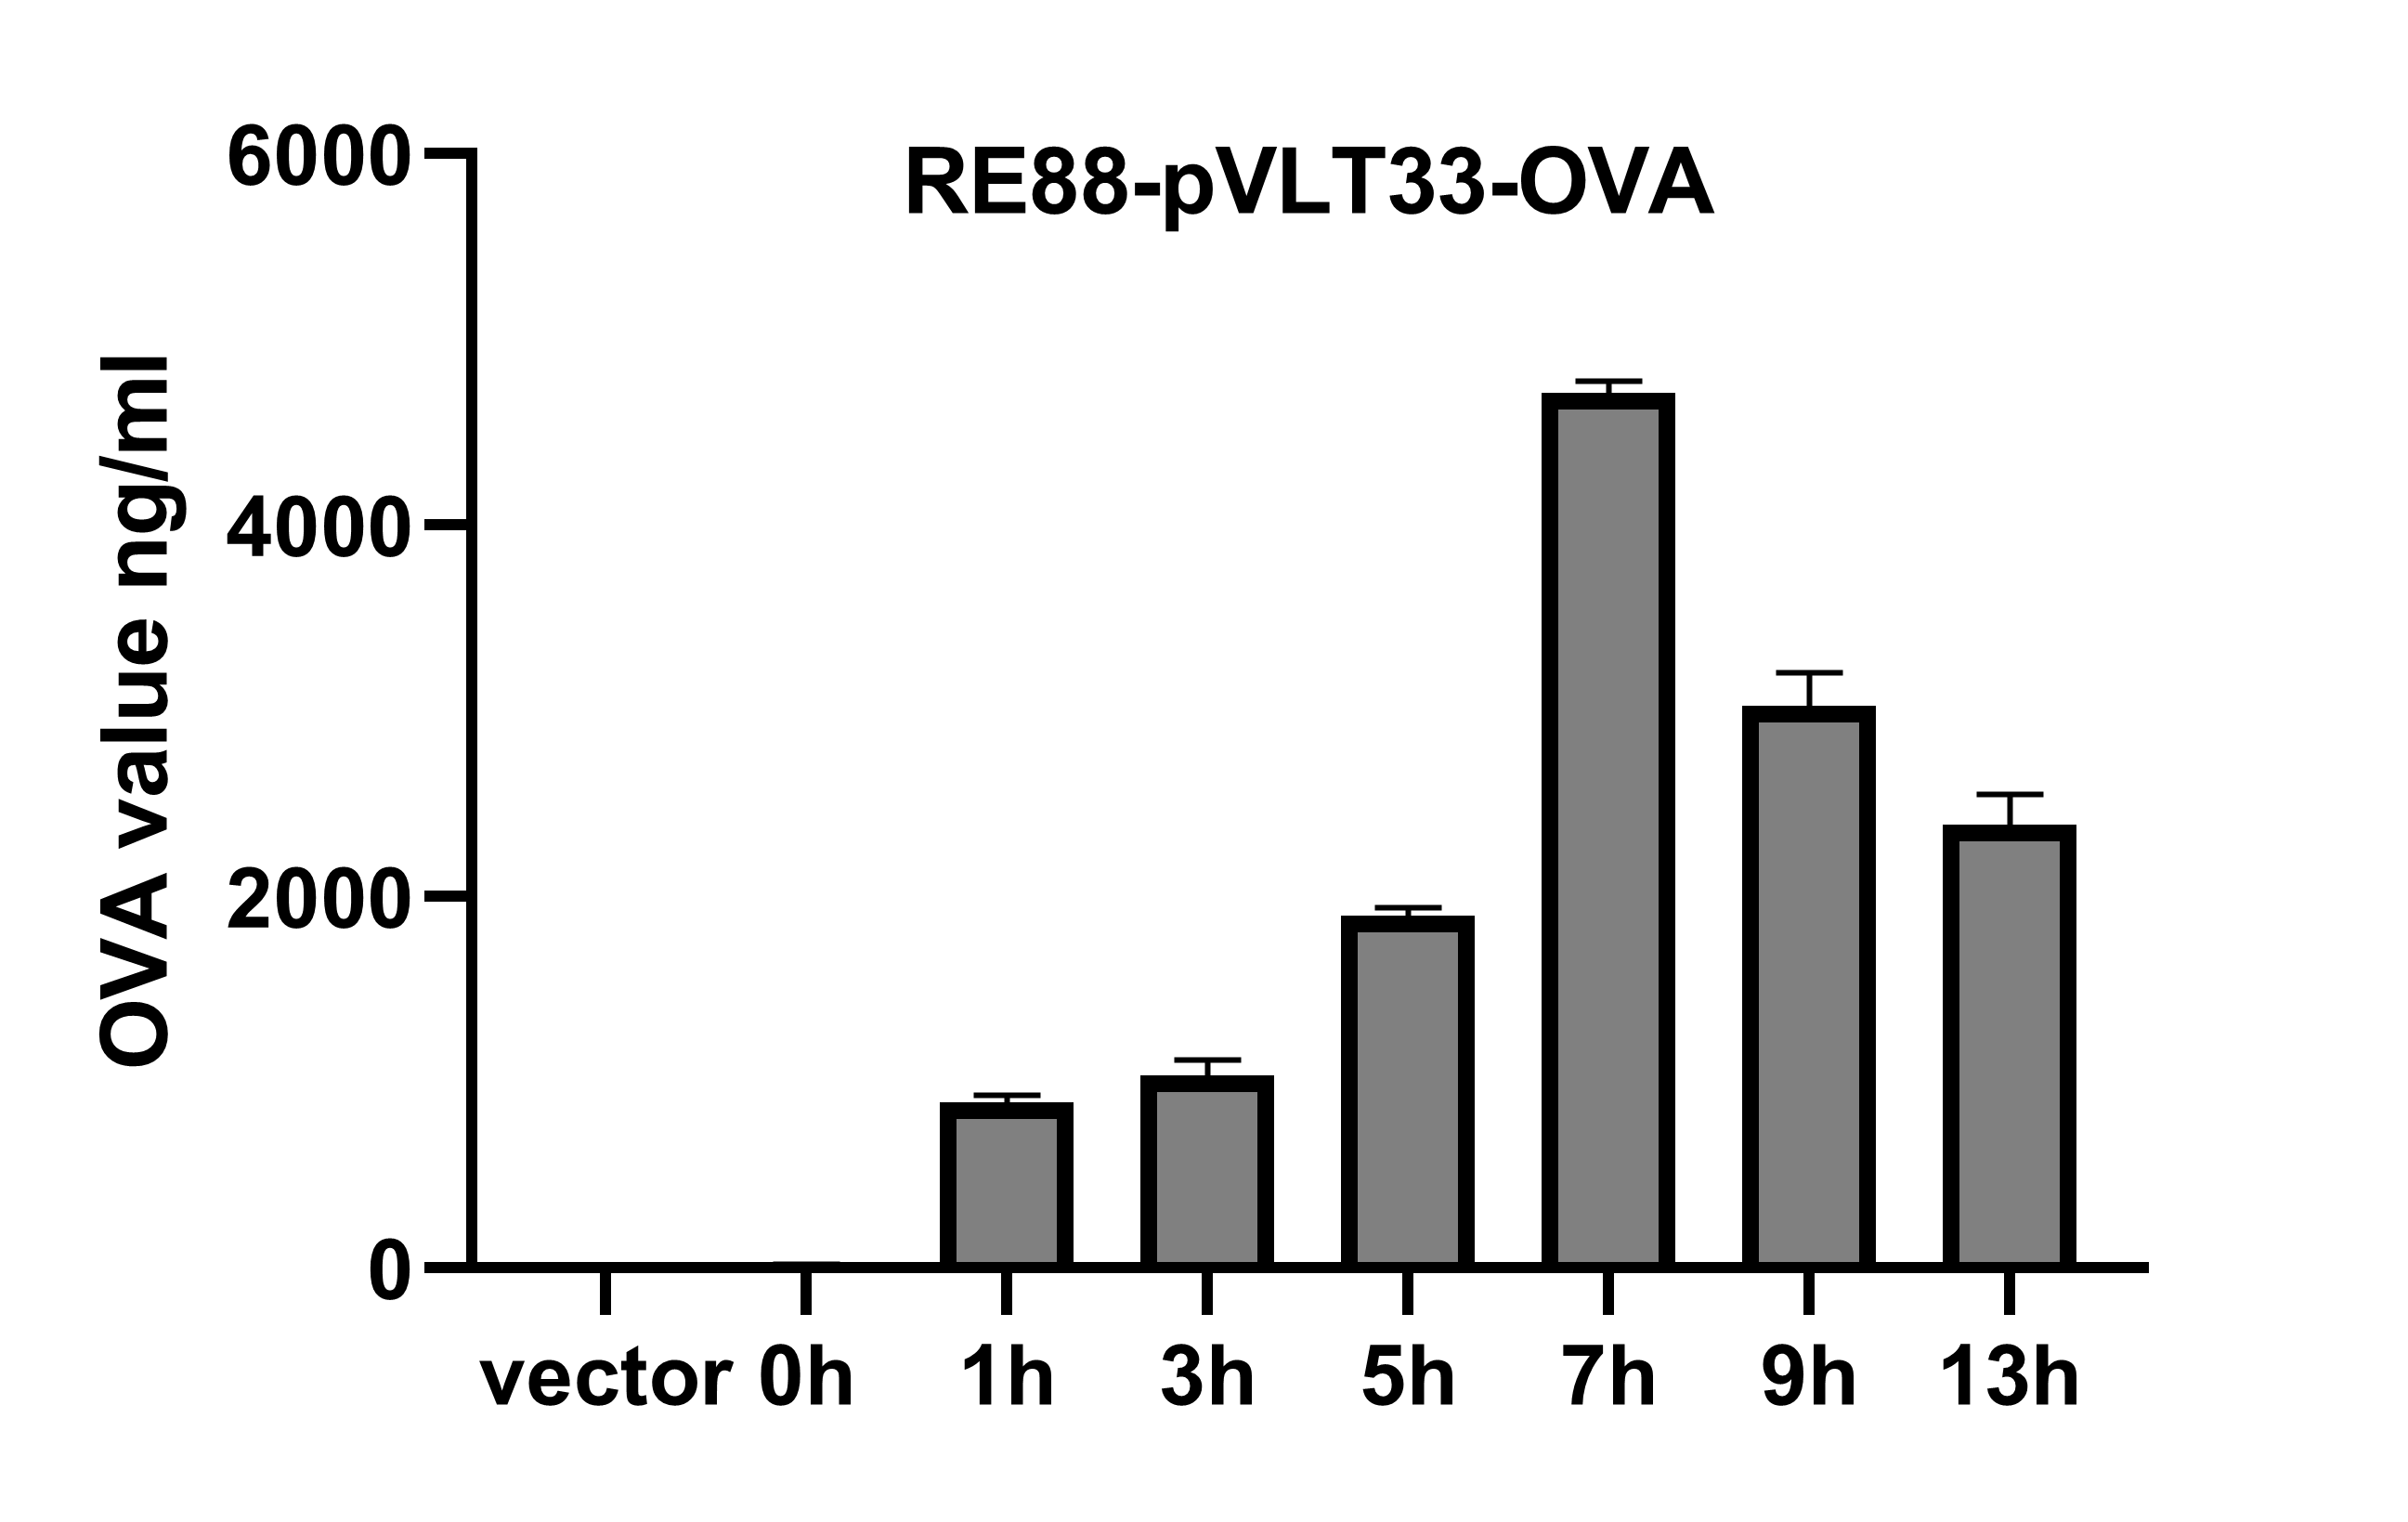
**

**Fig. S2. The inducible expression of OVA by RE88-pVLT33-OVA.** OVA was engineered into a bacterial expression plasmid (pVLT33), and RE88 cells bearing recombinant pVLT33-OVA were induced to express OVA by IPTG. The RE88 cells were treated with 1 mM IPTG for 0, 1, 3, 5, 7, 9 or 13 hours, and OVA expression in the bacterial lysate was measured by ELISA.


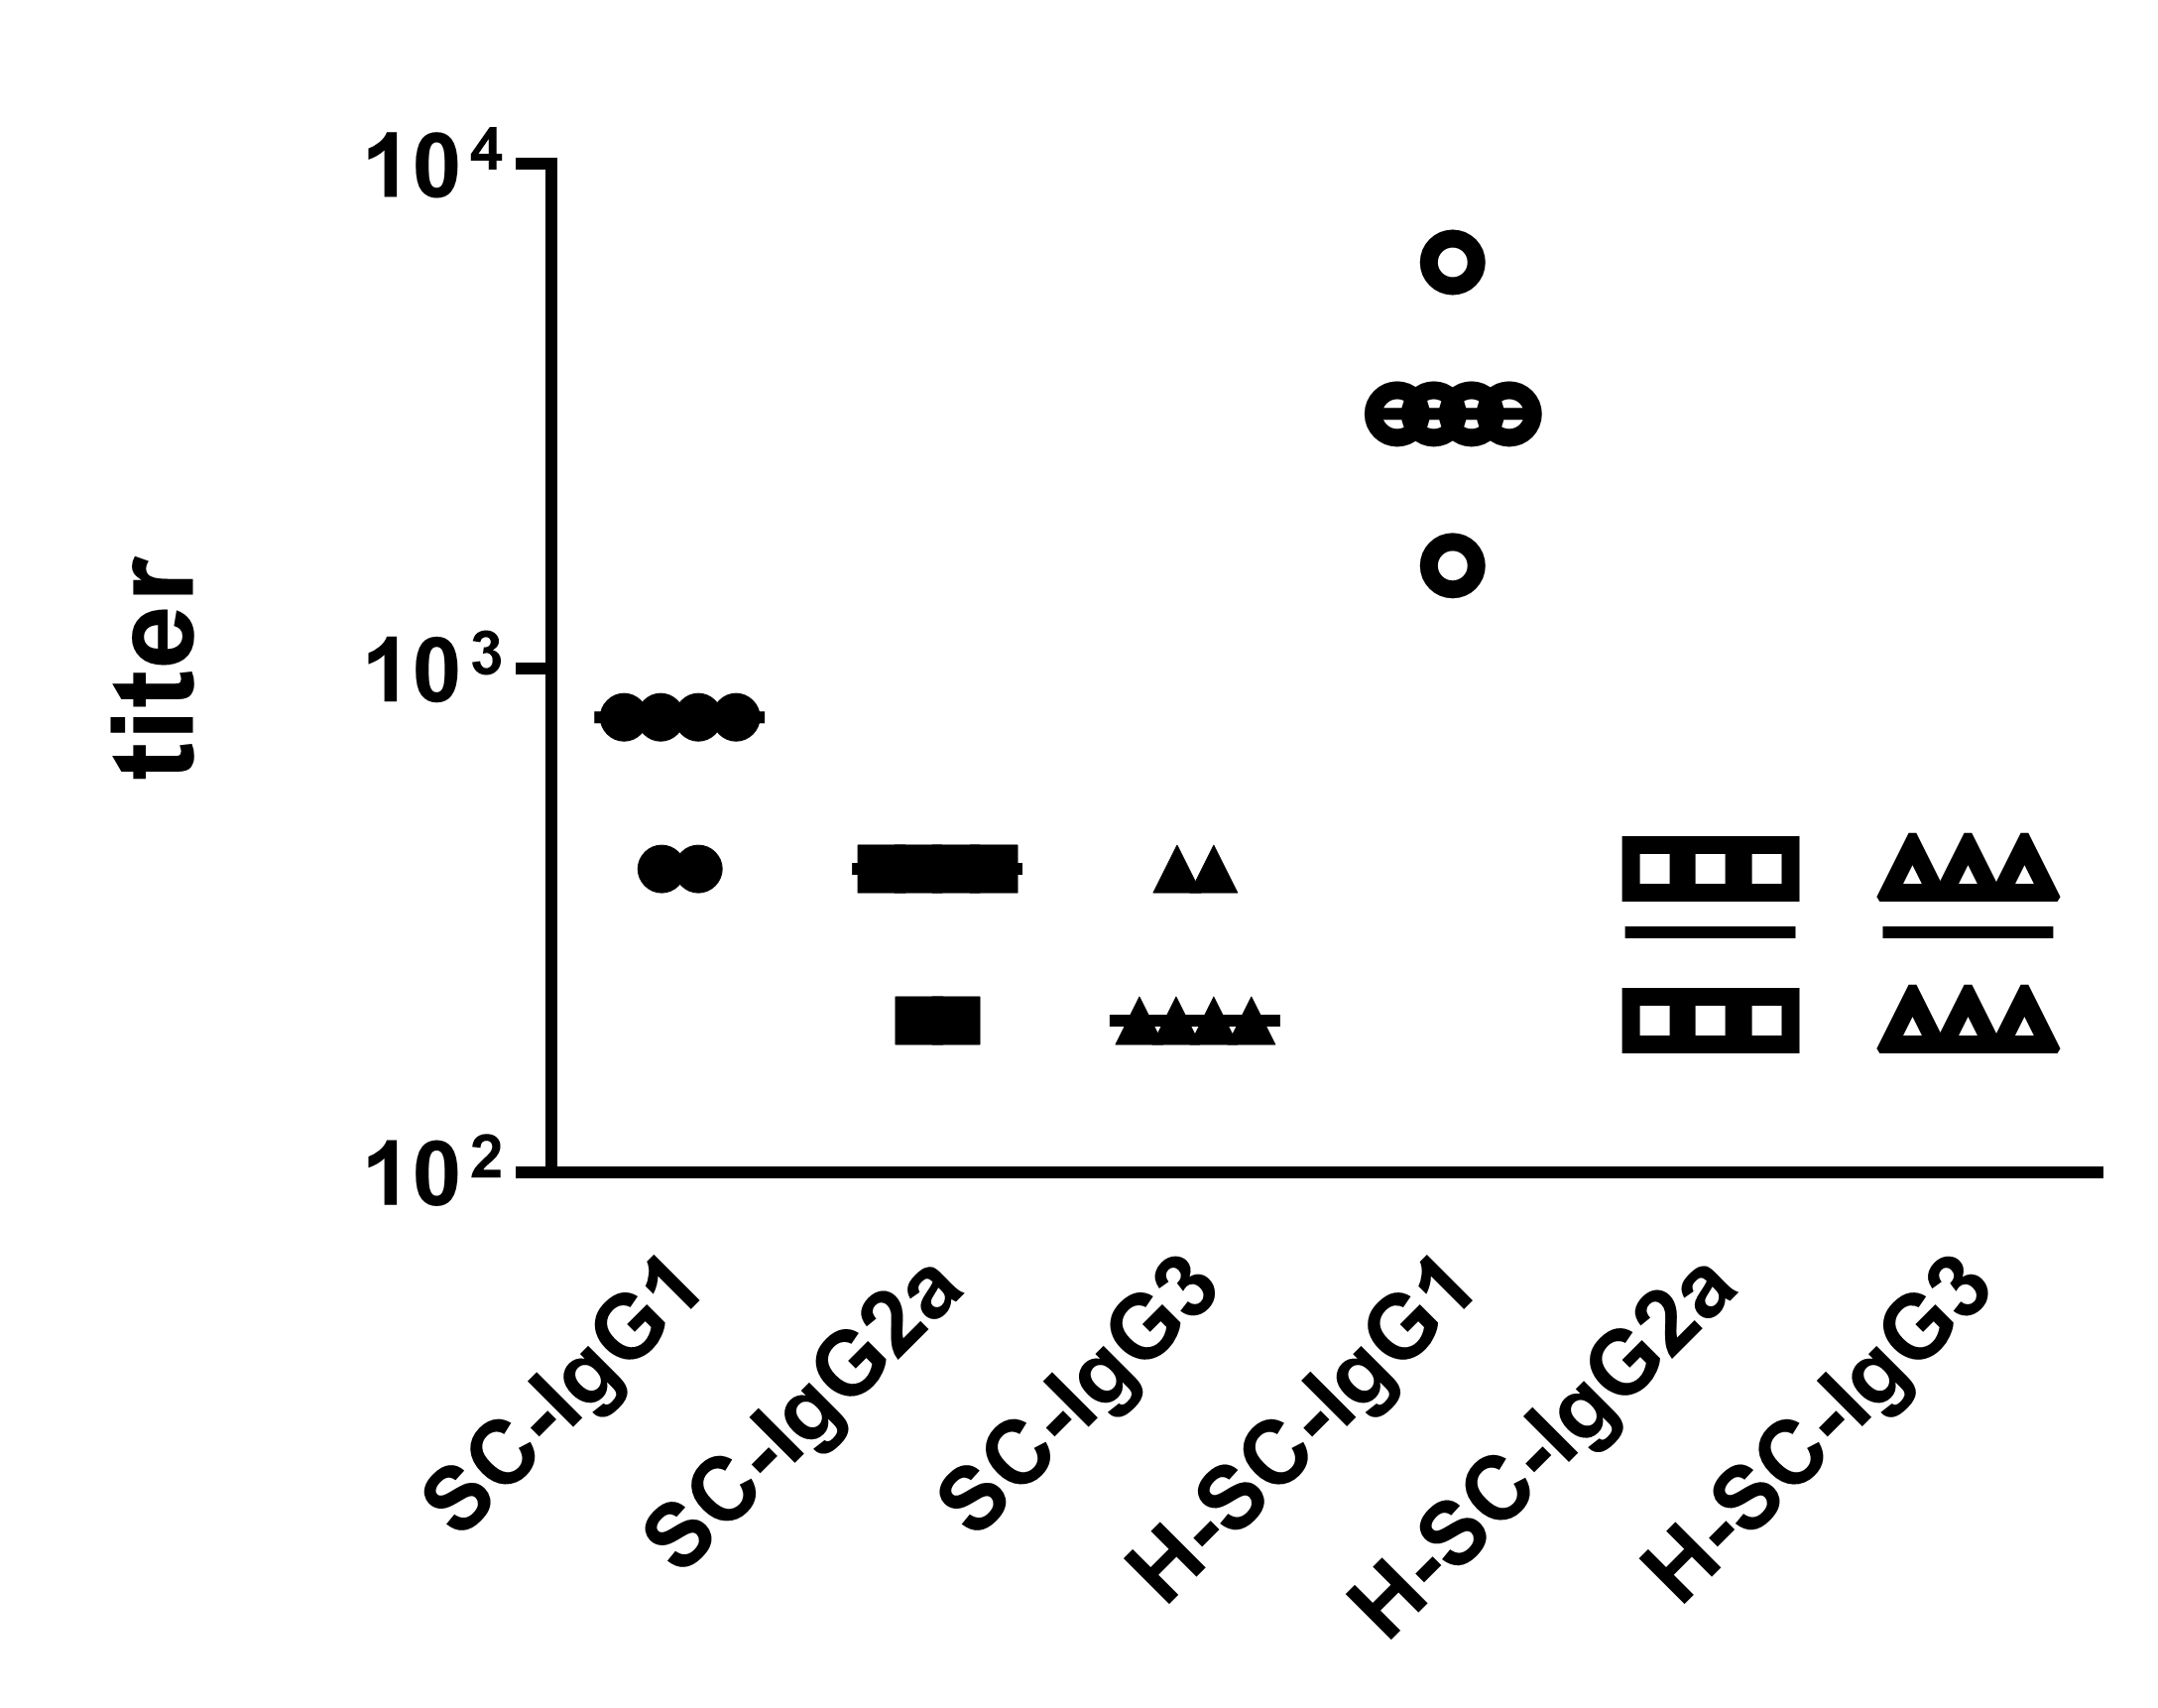


**Fig. S3. Evaluation of anti-OVA IgG subtypes after subcutaneous vaccination with non-inactivated or H2O2-inactivated RE88-pVLT33-OVA.** Anti-OVA IgG subtypes in mouse serum were measured at 42 days after the first immunization (6 independent experiments). SC: subcutaneous vaccination with non-inactivated RE88-pVLT33-OVA; H-SC: subcutaneous vaccination with H2O2-inactivated RE88-pVLT33-OVA.


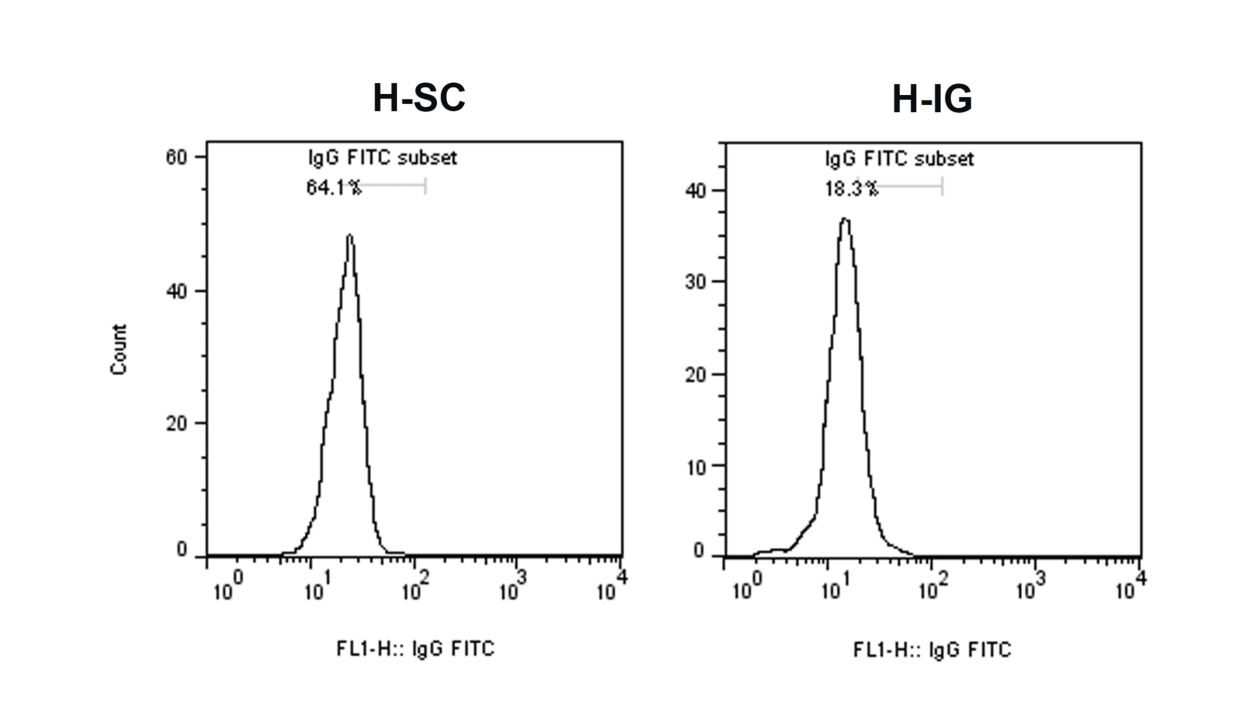


**Fig. S4. Ability of the neutralizing antibody in mouse serum to bind to the target tumor cells.** The mice had been vaccinated intragastrically (H-IG) or subcutaneously (H-SC) with H2O2-inactivated RE88-pVLT33-OVA. Serum dilution: 1:400.


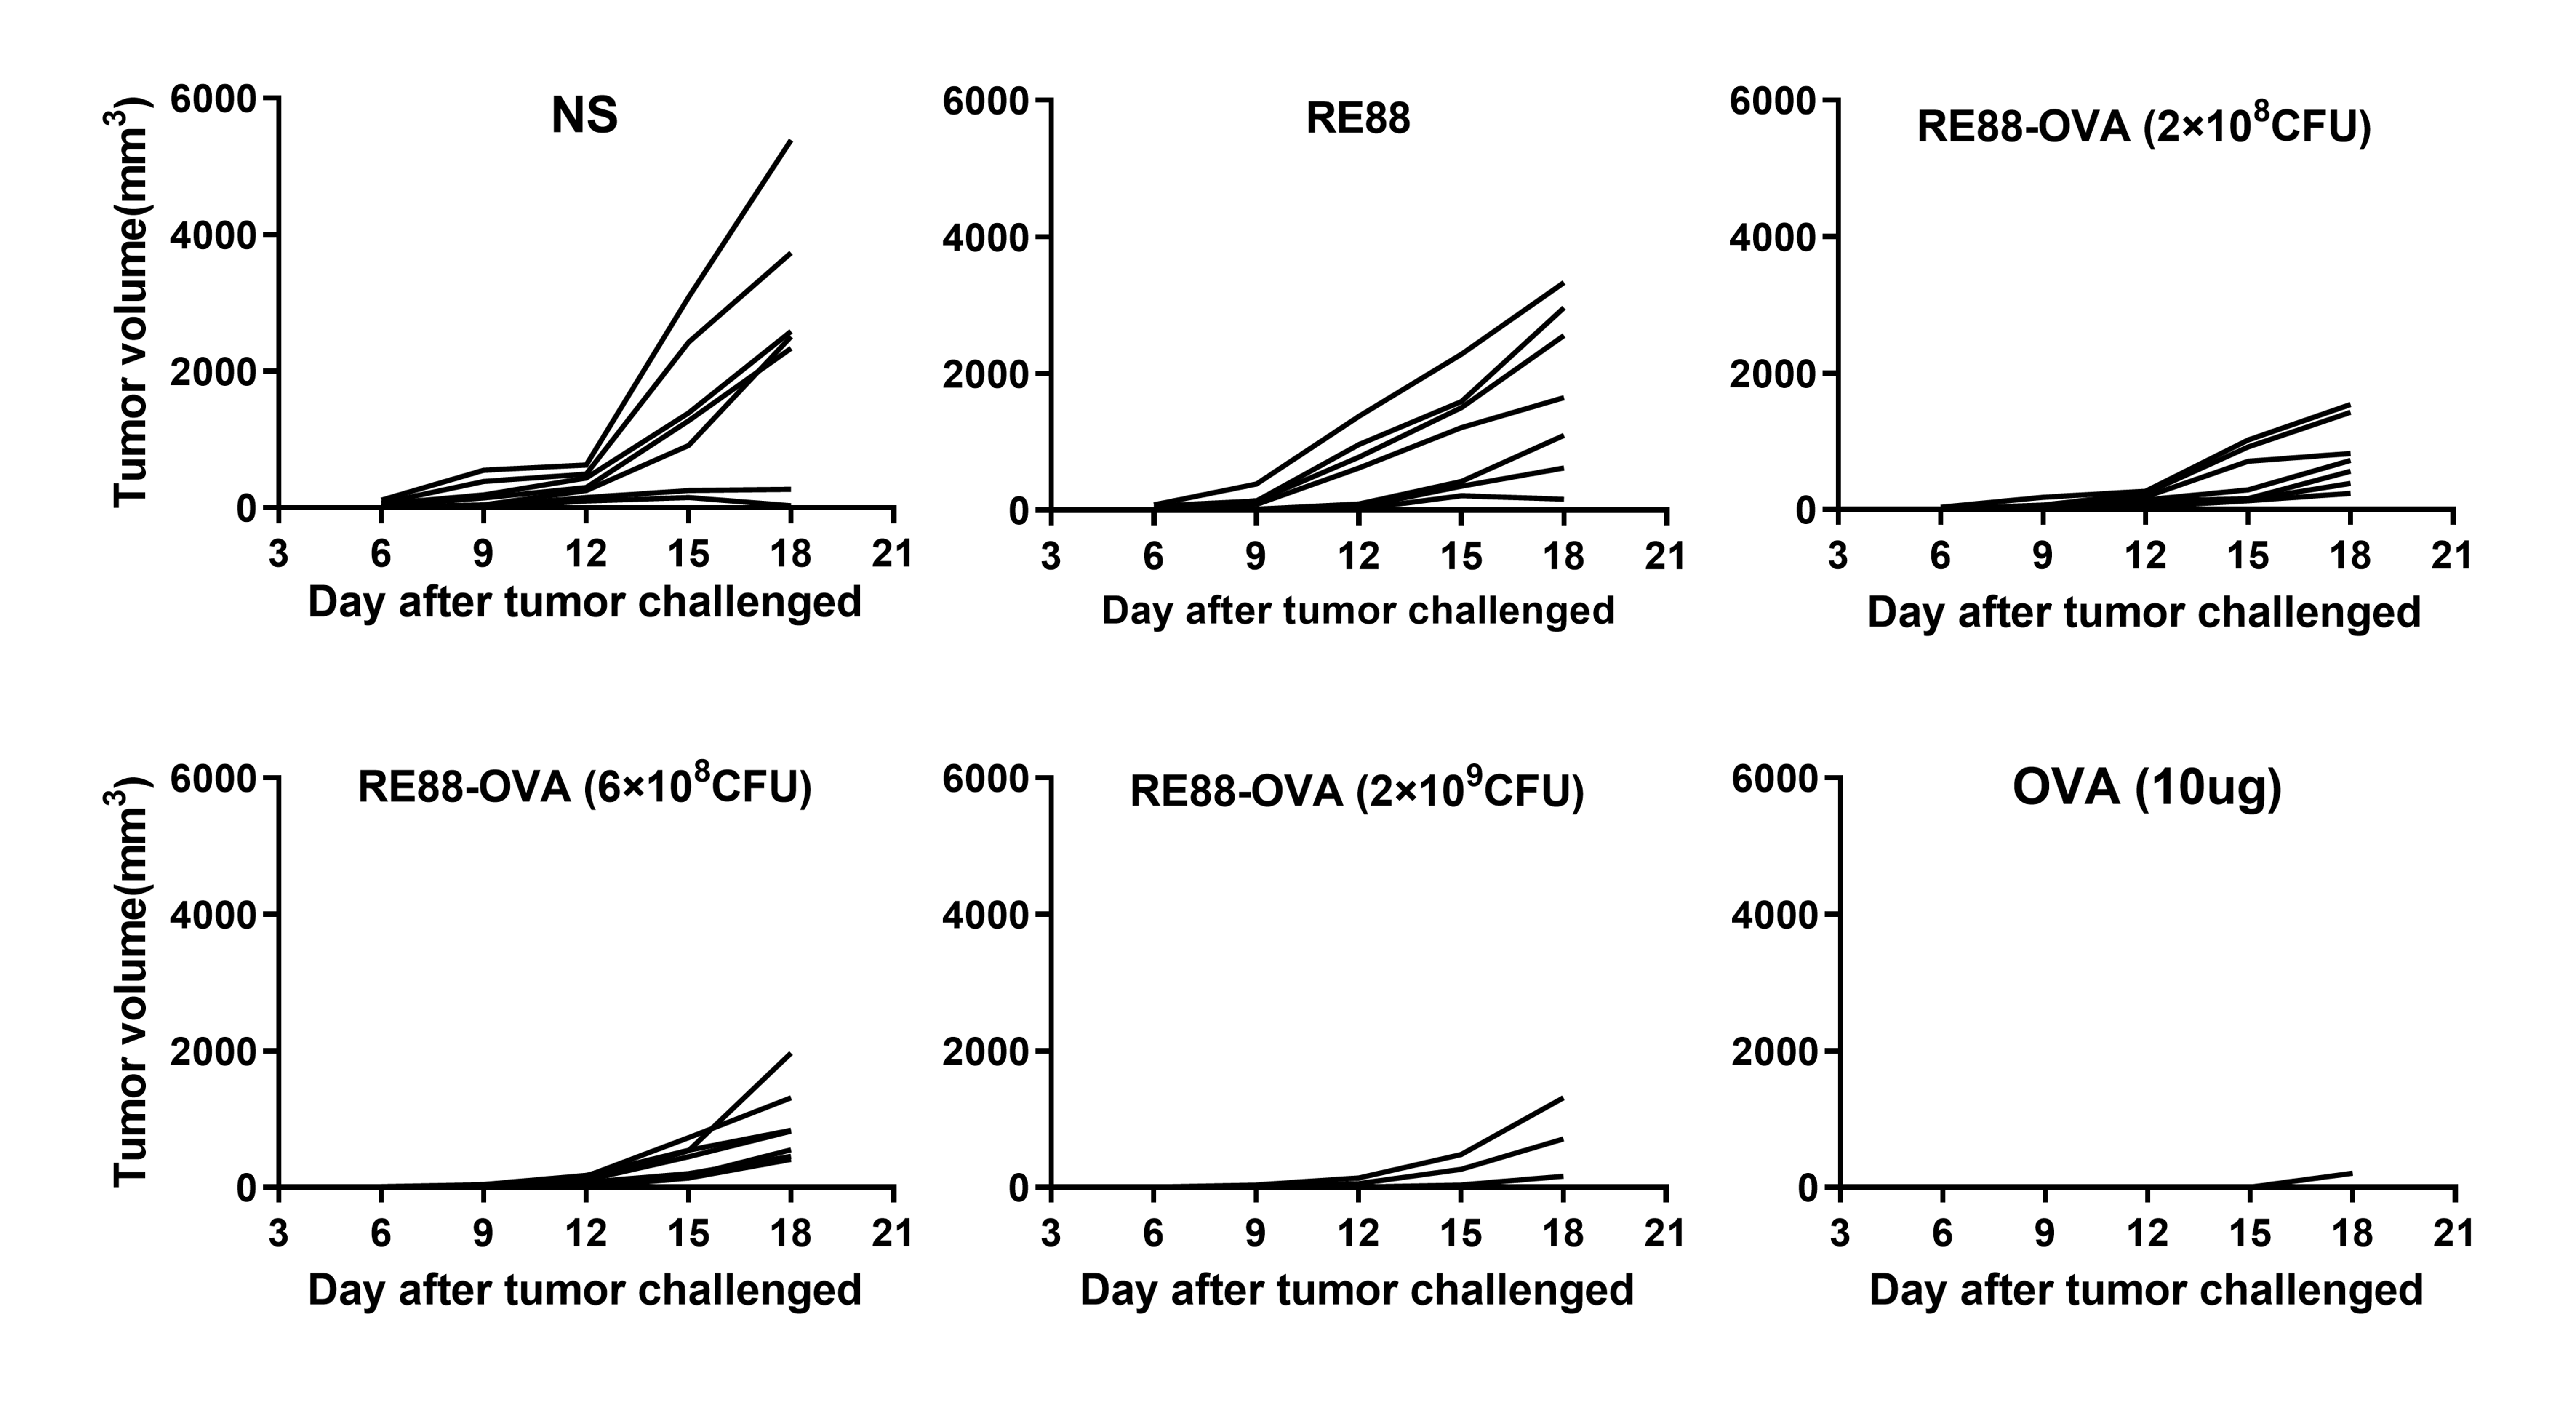


**Fig. S5. Effects of prophylactic subcutaneous vaccination with H2O2-inactivated RE88-pVLT33-OVA on tumor growth in mice.** The length and width of the subcutaneous tumor (if detectable) was measured every 3 days following challenge with the tumor, and tumor volume was calculated as: tumor volume = 0.5 × length (mm) × [width (mm)]2. CFU: colony-forming units;NS: normal saline (negative control); RE88: unmodified strain; RE88OVA: H2O2-inactivated RE88-pVLT33-OVA; OVA-10 µg (positive control).
